# Supplementary material for: Drug-Induced Senescent Multiple Myeloma Cells Elicit NK Cell Proliferation by Direct or Exosome-Mediated IL15 Trans -Presentation
Source: Oxford University Press journal article supplement (doi:10.1158/2326-6066.cir-17-0604), 2018-04-24
Supplement: 23266066cir170604-sup-191090_3_supp_4687555_p72kcw.docx [file 23266066cir170604-sup-191090_3_supp_4687555_p72kcw.docx]

**Fig S1. MM cells acquire a senescent phenotype upon genotoxic drug treatment.**

(A) RPMI8226 and ARK cells were treated 48h with doxorubicin (DOX) and melphalan (MEL), and left the following 24h without drug. Bafilomycin A1 was added to cells to induce lysosomal alkalinization, followed by 1h incubation with C12FDG to analyze senescent cells by flow cytometry. Results are representative of 1 out of 3 independent experiments. (B) Patient’s PCs were analyzed as described before to evaluate the senescence phenotype upon DOX treatment. Number represents -Gal+ cells. (C) PCs were fixed, and incubated overnight at 37°C without CO2 with SA--Gal staining solution (Materials and Methods). Senescent cells were identified as blue-stained cells by microscopy. (D) RPMI8226 and ARK cells were treated 48h with Bortezomib (BOR) and Lenalidomide (LENA), and left the following 24h without drug and the percentage of senescent cells was analyzed by flow cytometry.
