# Supplementary material for: Drug-Induced Senescent Multiple Myeloma Cells Elicit NK Cell Proliferation by Direct or Exosome-Mediated IL15 Trans -Presentation
Source: Oxford University Press journal article supplement (doi:10.1158/2326-6066.cir-17-0604), 2018-04-24
Supplement: 23266066cir170604-sup-191090_3_supp_4687608_p72nvb.docx [file 23266066cir170604-sup-191090_3_supp_4687608_p72nvb.docx]

**Fig S4.MEL-treated ARK cells elicit NK cell activation and proliferation by IL-15 trans-presentation.** (A) Freshly isolated primary NK cells were co-cultured with untreated- or MEL-treated ARK MM cells. CD69 expression was evaluated by immunofluorescence and FACS analysis. NK cells were also supplemented with 10ng/mL of human recombinant IL-15 as control. Result from a representative donor is shown.Numbers represent the percentage of CD69+cells.(B) The average of at least three independent experiments is shown. (C) Cell proliferation was analyzed by in vitro labeling of NK cells with the thymidine analogue BrdU and the subsequent detection of incorporated BrdU with specific anti-BrdU monoclonal Ab. Result from a representative donor is shown. Numbers represent the percentage of BrdU+ cells. (D) The average of at least three independent experiments is shown. *p <0.05; **p <0.01
