# Supplementary material for: Drug-Induced Senescent Multiple Myeloma Cells Elicit NK Cell Proliferation by Direct or Exosome-Mediated IL15 Trans -Presentation
Source: Oxford University Press journal article supplement (doi:10.1158/2326-6066.cir-17-0604), 2018-04-24
Supplement: 23266066cir170604-sup-191090_3_supp_4687610_p72nvb.docx [file 23266066cir170604-sup-191090_3_supp_4687610_p72nvb.docx]

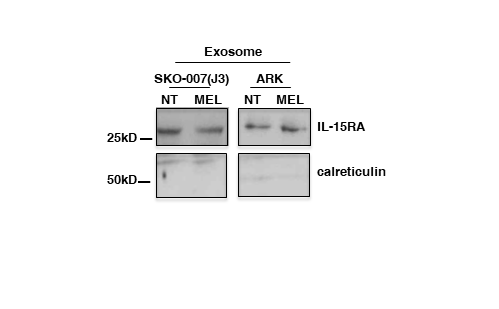


**Fig S5.MEL-treated SKO-007(J3) and ARK exosomes display a similar IL-15RA expression.** IL-15R and calreticulin expression was evaluated in exosome lysates by Western blot analysis.
